# Supplementary material for: PreImplantation factor (PIF) protects cultured embryos against oxidative stress: relevance for recurrent pregnancy loss (RPL) therapy
Source: PubMed Central journal article supplement (PMC5464799; doi:10.18632/oncotarget.16028), 2017-03-08
Supplement: oncotarget-08-32419-s001.pdf [file oncotarget-08-32419-s001.pdf]

# PreImplantation factor (PIF) protects cultured embryos against oxidative stress: relevance for recurrent pregnancy loss (RPL) therapy

## Supplementary Material

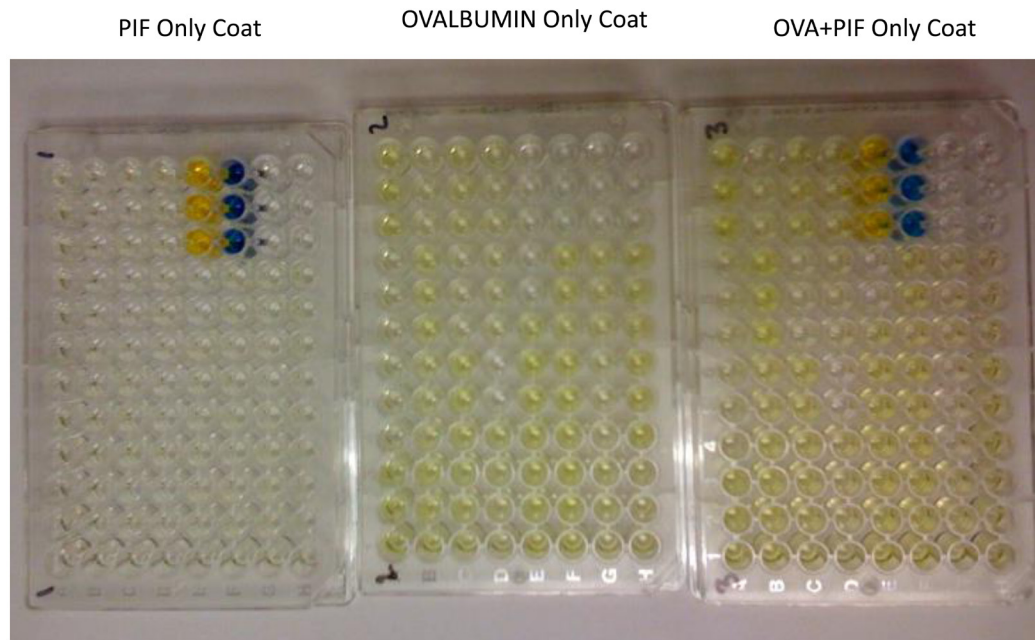

**Supplementary Figure 1: ELISA based PIF antibody detection: data shows that the antibody detected is likely against egg component and not against PIF**

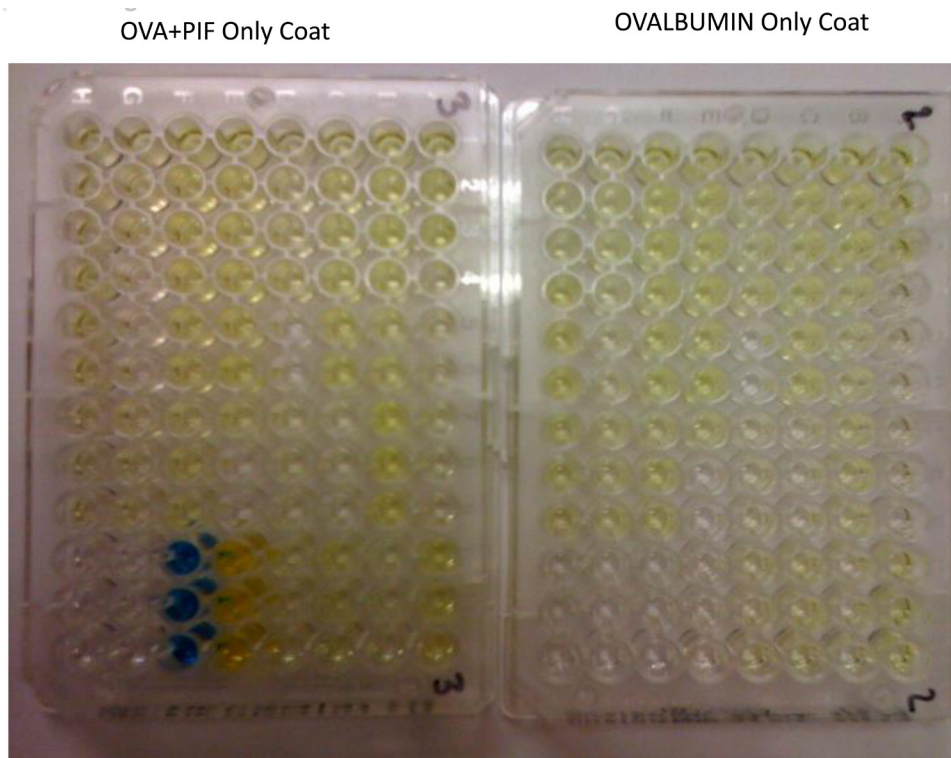

**Supplementary Figure 2: ELISA based PIF antibody detection: data shows that the antibody detected is likely against egg component and not against PIF**

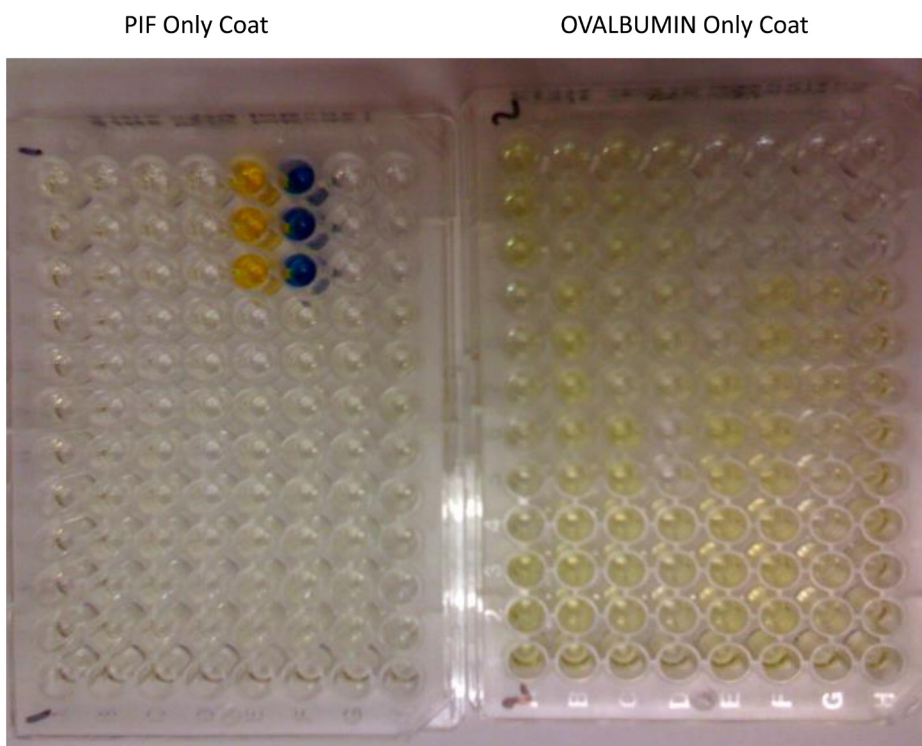

**Supplementary Figure 3: ELISA based PIF antibody detection: confirmation that only the ovalbumin presence and not PIF leads to the antibody detection.**

**Supplementary Table 1: PIF PREVENTS EMBRYO DEMISE CAUSED BY RPL SERA  
<3kDa Fraction Causes Embryo Delay & >3kDa Fraction Causes Embryo Demise**

| <b>PIF+</b> | <b>34 Total</b> | <b>PIF-</b> | <b>34 Total</b> |
|-------------|-----------------|-------------|-----------------|
| P29 Blast   | 85.3%           | 15 Blast    | 44.1%           |
| 2 Eblast    | 5.9%            | 4 Eblast    | 11.8%           |
| 1 Morula    | 2.9%            | 8 Morula    | 23.5%           |
| 0 6-8 Cell  | 0.0%            | 3 6-8 Cell  | 8.8%            |
| 2 2-4 Cell  | 5.9%            | 3 2-4 Cell  | 8.8%            |
| 0 Atretic   | 0.0%            | 1 Atretic   | 2.9%            |

**< 3 kDa sera fraction**

| <b>PIF+</b> | <b>33 Total</b> | <b>PIF-</b> | <b>33 Total</b> |
|-------------|-----------------|-------------|-----------------|
| 16 Blast    | 48.5%           | 12 Blast    | 36.4%           |
| 5 Eblast    | 15.2%           | 2 Eblast    | 6.1%            |
| 6 Morula    | 18.2%           | 4 Morula    | 12.1%           |
| 0 6-8 Cell  | 0.0%            | 0 6-8 Cell  | 0.0%            |
| 1 2-4 Cell  | 3.0%            | 0 2-4 Cell  | 0.0%            |
| 5 Atretic   | 15.2%           | 15 Atretic  | 45.5%           |

**> 3 kDa sera fraction**

**Supplementary Table 2: PIF PREVENTS EMBRYO DEMISE CAUSED BY OXIDATIVE STRESS  
Blocks PDI / Thioredoxin Inhibitor Effect**

| Group              |            | Cleaved    |                          | Blastocyst |                         |                         |
|--------------------|------------|------------|--------------------------|------------|-------------------------|-------------------------|
|                    |            | N          | %                        | N          | % (of total)            | % (of cleaved)          |
| Control            | 248        | 176        | 70.0 <sup>a</sup>        | 71         | 28.6 <sup>a</sup>       | 40.3 <sup>a</sup>       |
| <b>PIF</b>         | <b>155</b> | <b>104</b> | <b>67.1<sup>ab</sup></b> | <b>46</b>  | <b>29.7<sup>a</sup></b> | <b>44.2<sup>a</sup></b> |
| PDI-inhibitor      | 247        | 145        | 58.7 <sup>b</sup>        | 15         | 6.1 <sup>b</sup>        | 10.3 <sup>b</sup>       |
| <b>PDI inh+PIF</b> | <b>236</b> | <b>148</b> | <b>60.1<sup>ab</sup></b> | <b>33</b>  | <b>14.0<sup>c</sup></b> | <b>22.3<sup>c</sup></b> |

PIF effect on cultured bovine zygotes cleavage and reaching the blastocyst stage.

(P < 0.05). N = No. of Embryos

Total zygote cleavage and embryo development to blastocyst stage for each treatment group.

(Replicates are combined.) Values in the same column with different superscripts are significantly different (p < 0.05).

**Supplementary Table 3.** Ligand-receptor interaction analysis in docking models of PIF and 16F16 to either oxidized PDI or reduced PDI form <sup>1</sup>.

|                                                                    | oxi PDI - PIF | oxi PDI - 16F16 | red PDI - PIF    | red PDI - 16F16 |
|--------------------------------------------------------------------|---------------|-----------------|------------------|-----------------|
| APBS Binding energy [kJ/mol]                                       | -4.07         | 5.95            | <b>-6.95</b>     | 0.40            |
| Electrostatic Interaction energies [kcal/mol]                      | 9.43          | -13.42          | <b>-18.47</b>    | 3.00            |
| Electrostatic Interaction energies (distance dependent) [kcal/mol] | -5.46         | -2.77           | -5.46            | -0.45           |
| Electrostatic energy [kcal/mol]                                    | -23249.38     | -22311.24       | <b>-23798.96</b> | -22779.24       |
| Total charge                                                       | -19           | -20             | -20              | -21             |
| APBS Solvation energy [kcal/mol]                                   | -9866.09      | -9690.88        | <b>-10326.38</b> | -10230.40       |
| MEP interaction energy (electrostatic interaction)                 | 9.4380        | -13.4179        | <b>-18.4713</b>  | 3.0079          |

<sup>1</sup> Ligand-receptor interaction was evaluated by modeling biomolecular solvation through solving the Poisson-Boltzmann equation and related equations, to calculate solvation energies and electrostatic properties of the complex. The APBS (Adaptive Poisson-Boltzmann Solver) software, developed by Nathan Baker in collaboration with J. Andrew McCammon and Michael Holst, was used as plug-in implementation to Vega ZZ package. APBS calculates binding free energies (*APBS Binding energy*) by dividing the binding process up into solvation (*APBS Solvation energy*) and Coulombic components. Intermolecular Coulombic contributions to the solvation energy are assessed using either *APBS Electrostatic Interaction energies* or *Molecular electrostatic potential (MEP) interaction energy*.
